# Supplementary material for: Myocardial infarction affects Cx43 content of extracellular vesicles secreted by cardiomyocytes
Source: PubMed Central journal article supplement (PMC7652393; doi:10.26508/lsa.202000821), 2020-10-23

**Figure1A**

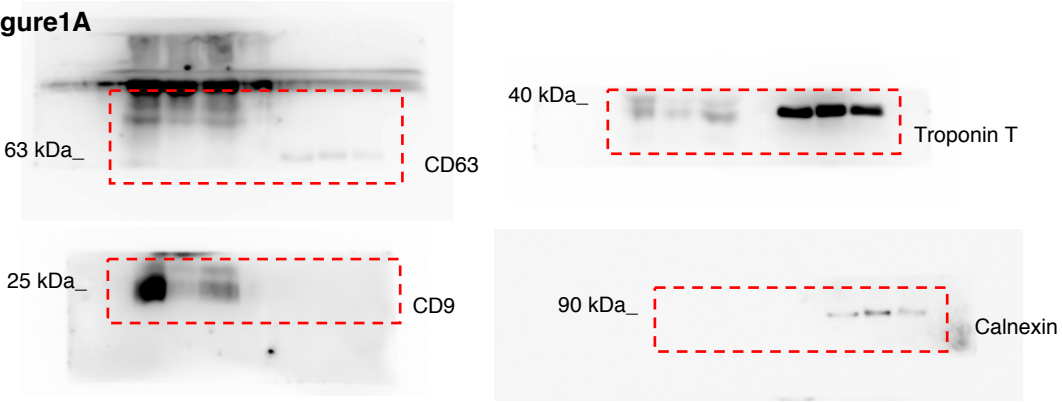

**Figure1D**

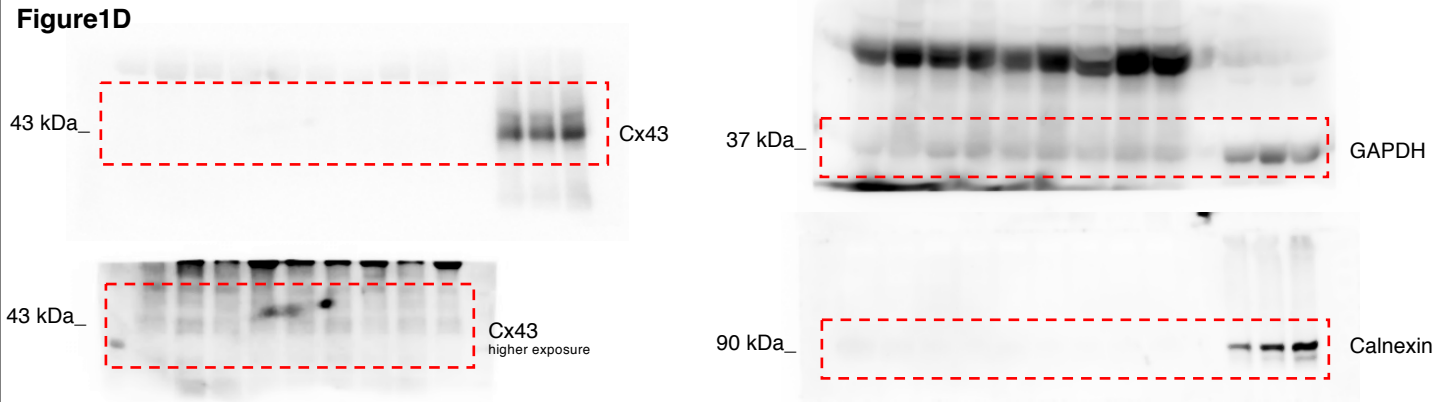

**Figure1E**

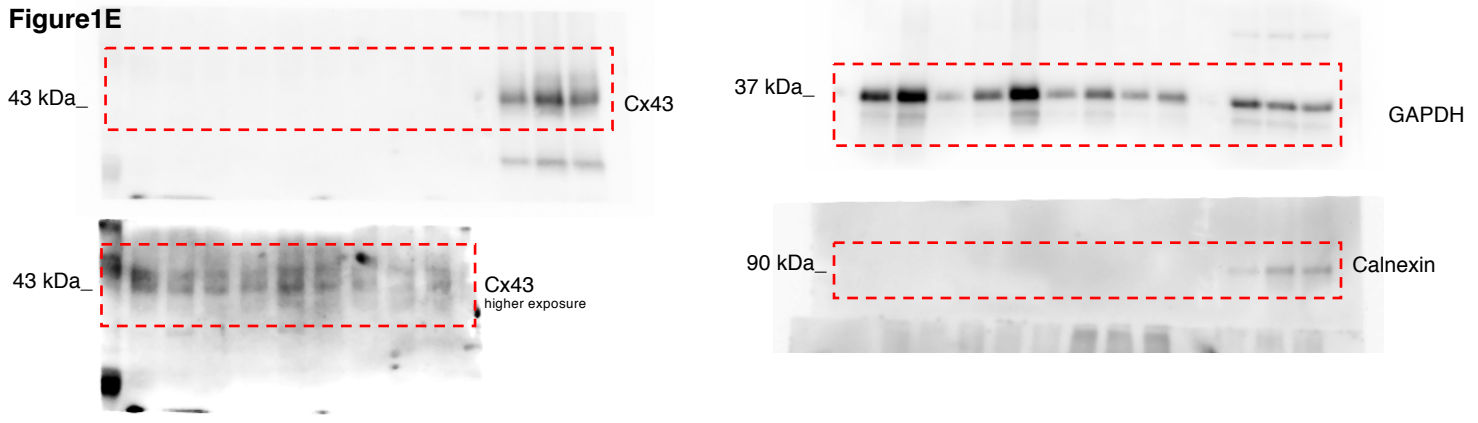

Supplement: LSA-2020-00821_SdataF1.pdf [file LSA-2020-00821_SdataF1.pdf]
