# Supplementary material for: Myocardial infarction affects Cx43 content of extracellular vesicles secreted by cardiomyocytes
Source: PubMed Central journal article supplement (PMC7652393; doi:10.26508/lsa.202000821), 2020-10-23

**Figure3A**

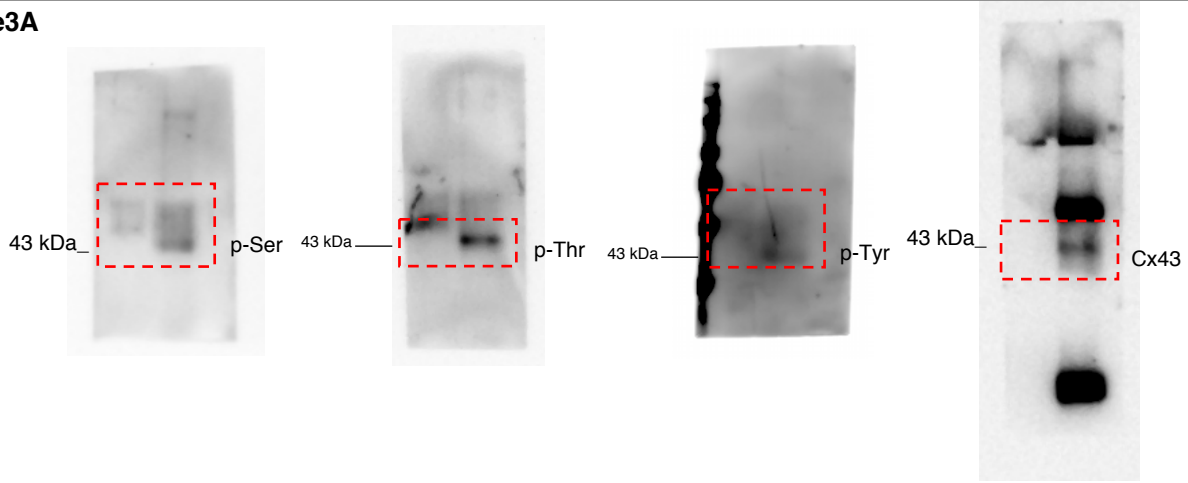

**Figure3B**

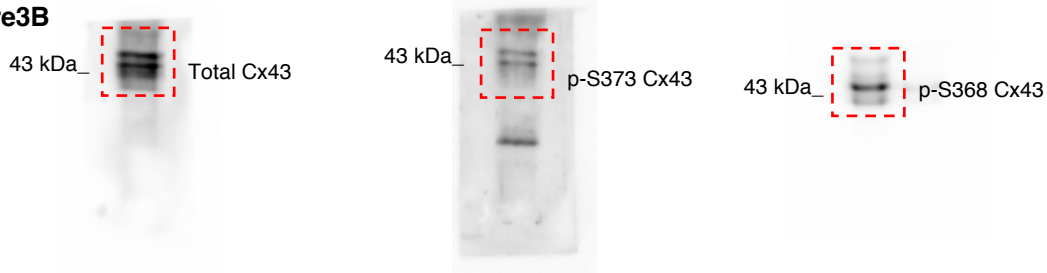

**Figure3C**

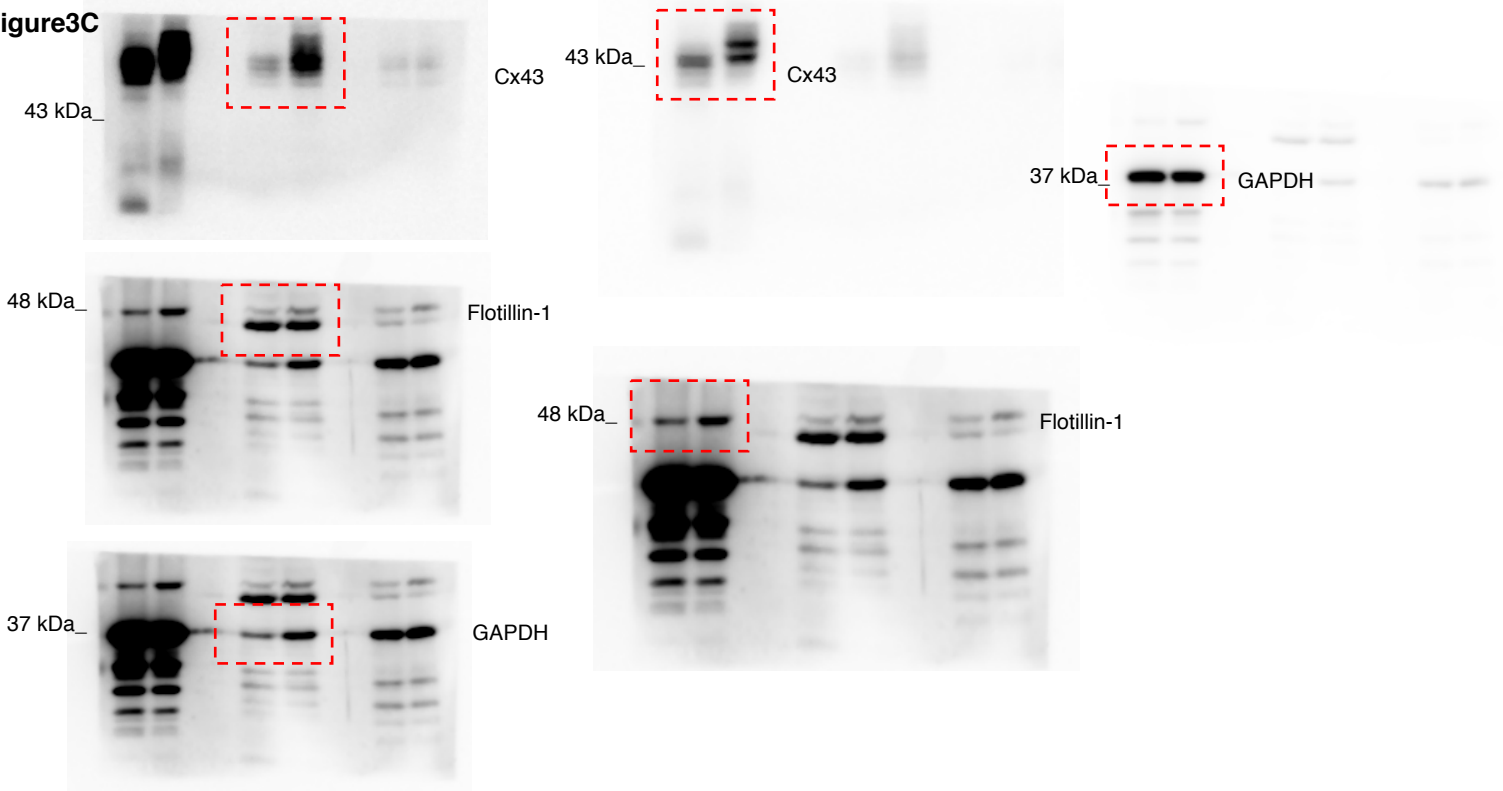

**Figure3D**

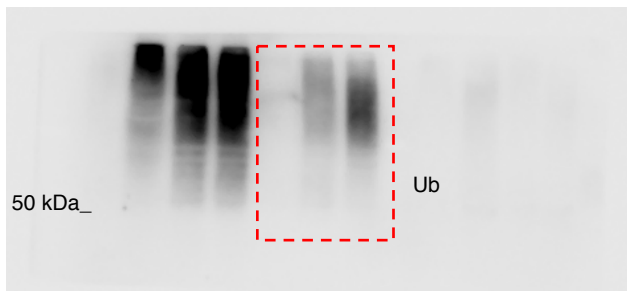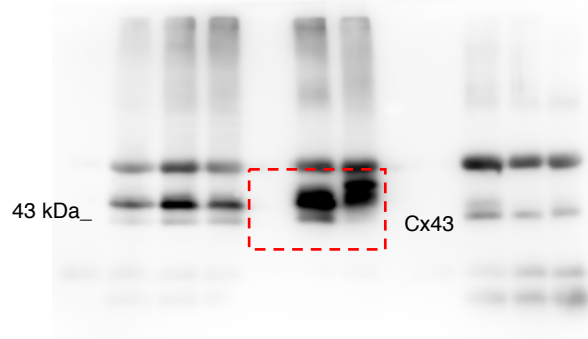

**Figure3E**

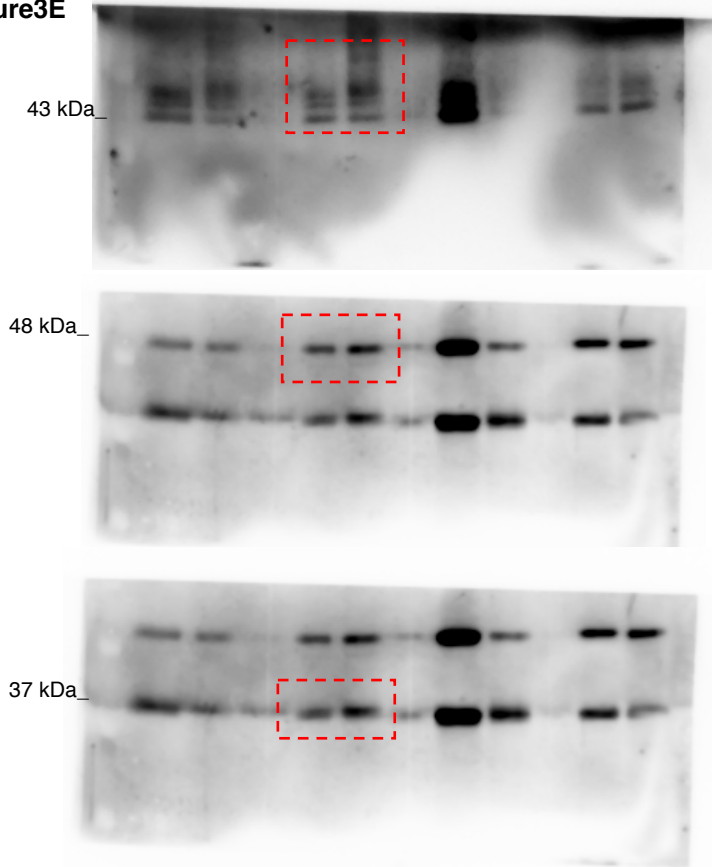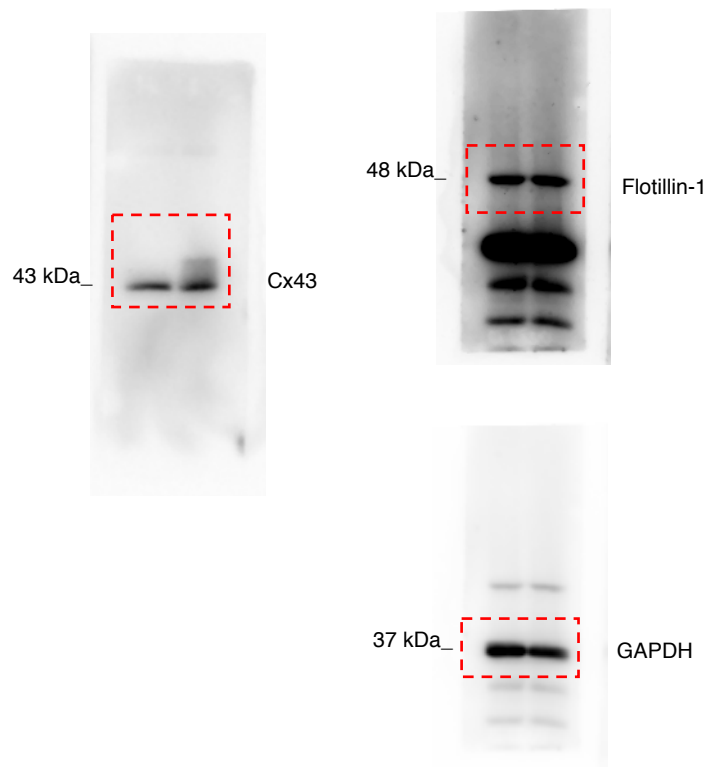

**Figure3F**

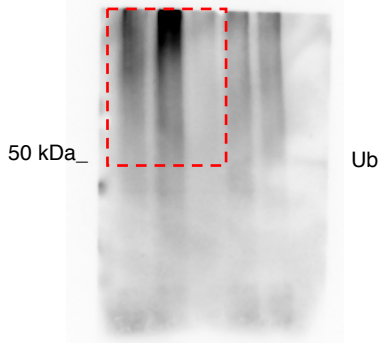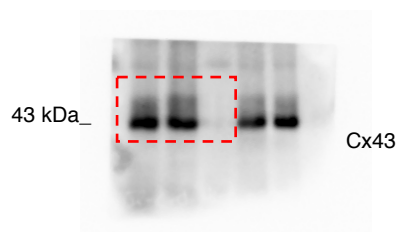

**Figure3G**

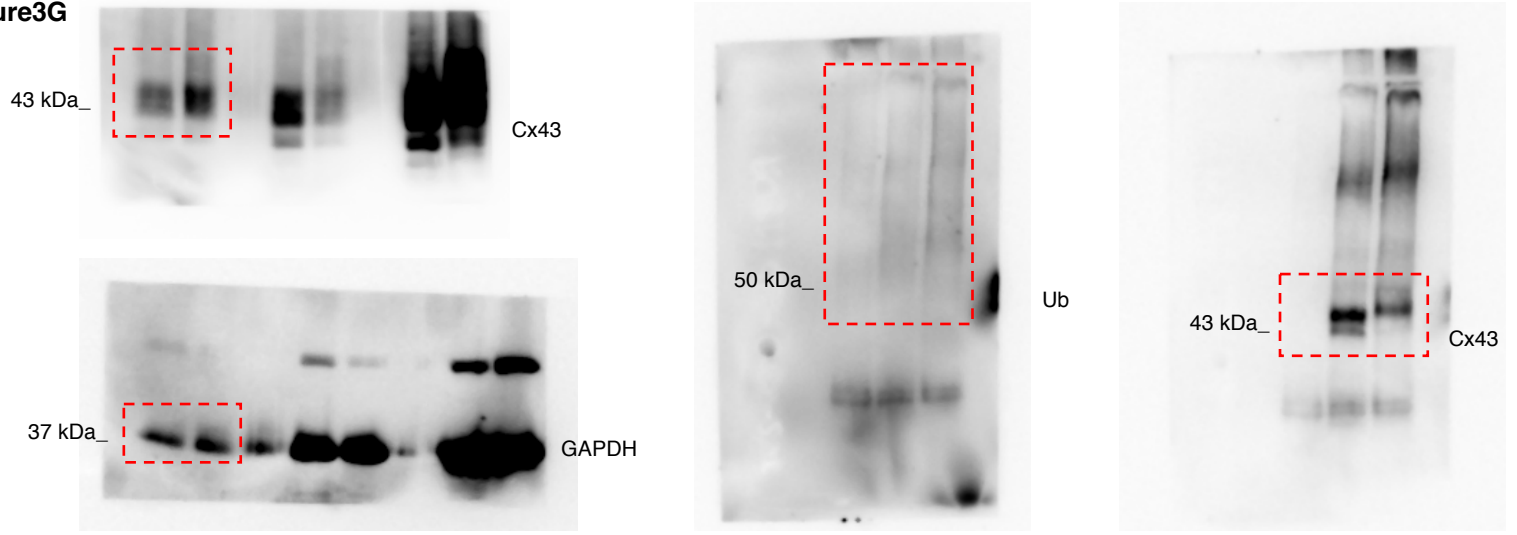

**Figure3H**

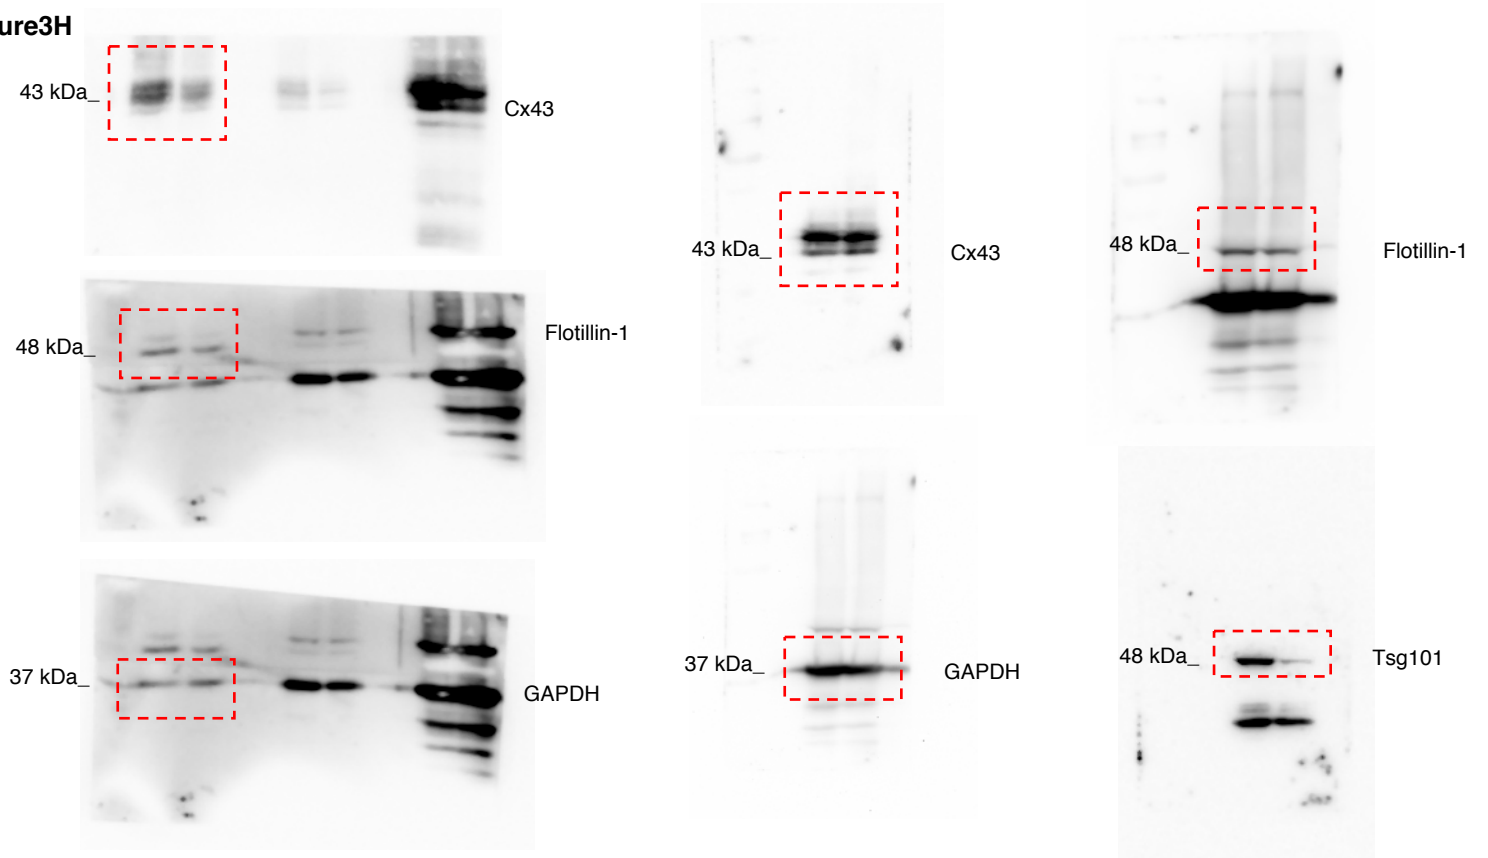

Supplement: LSA-2020-00821_SdataF3.pdf [file LSA-2020-00821_SdataF3.pdf]
